# Supplementary material for: The Influence of Cellulose Ethers on the Physico-Chemical Properties, Structure and Lipid Digestibility of Animal Fat Emulsions Stabilized by Soy Protein
Source: MDPI journal article supplement (doi:10.3390/foods11050738), 2022-03-02
Supplement: s1 [file s1]

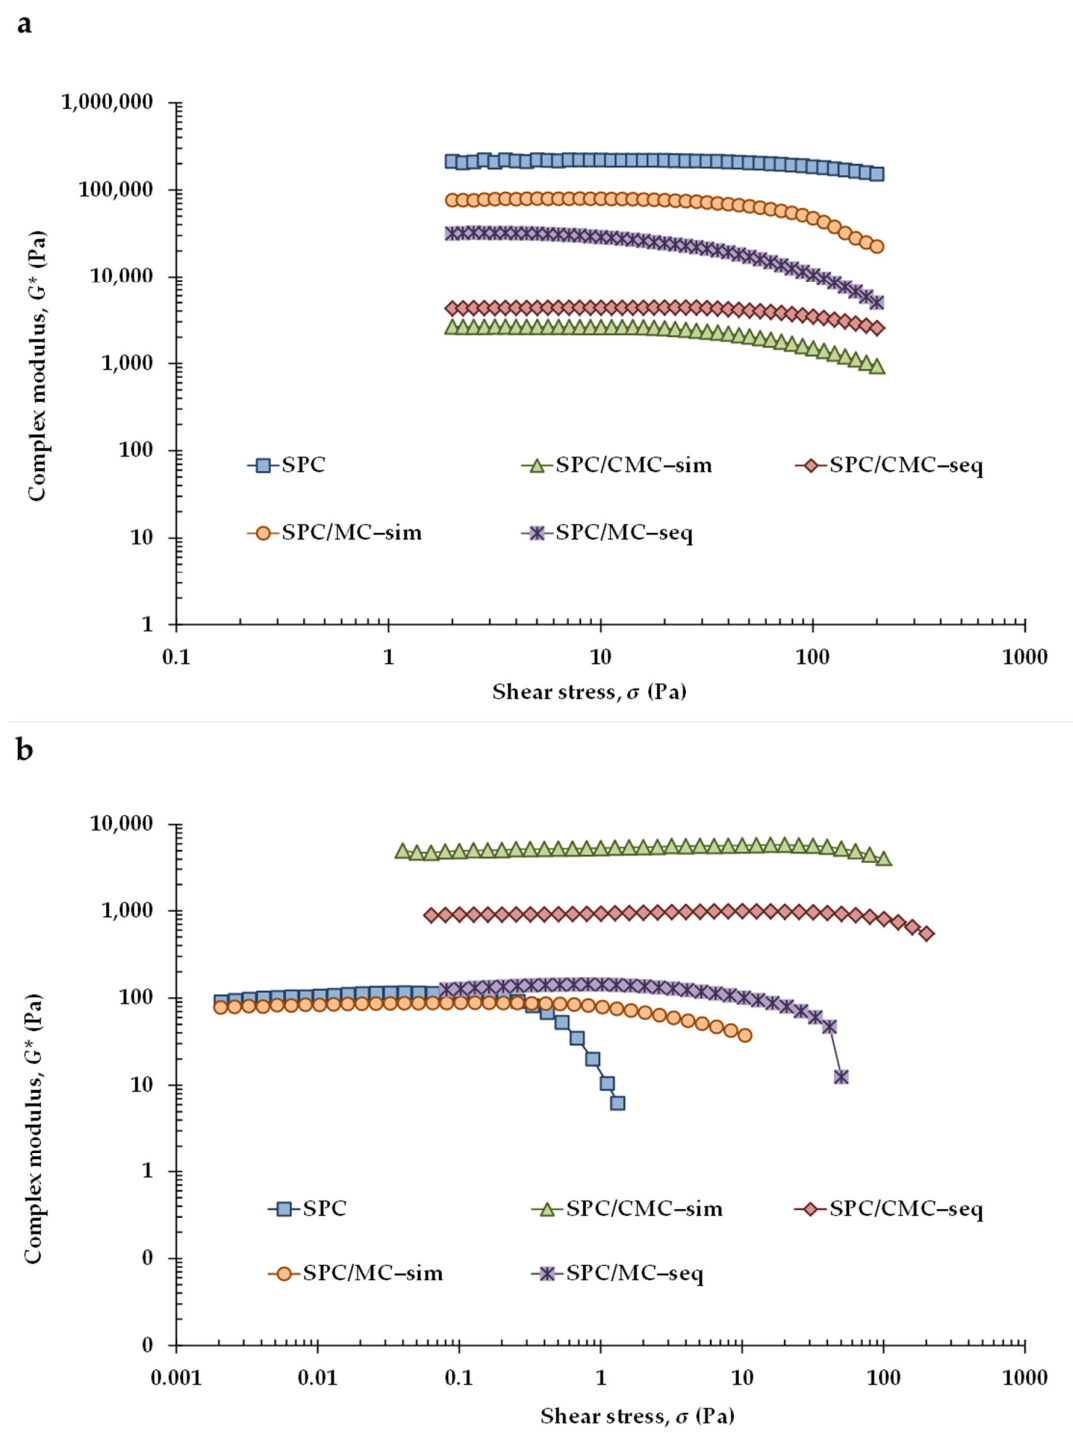

**Figure S1.** Complex modulus ( $G^*$ ) as a function of the applied shear stress for the emulsions: (a) at 5 °C; (b) at 37 °C.

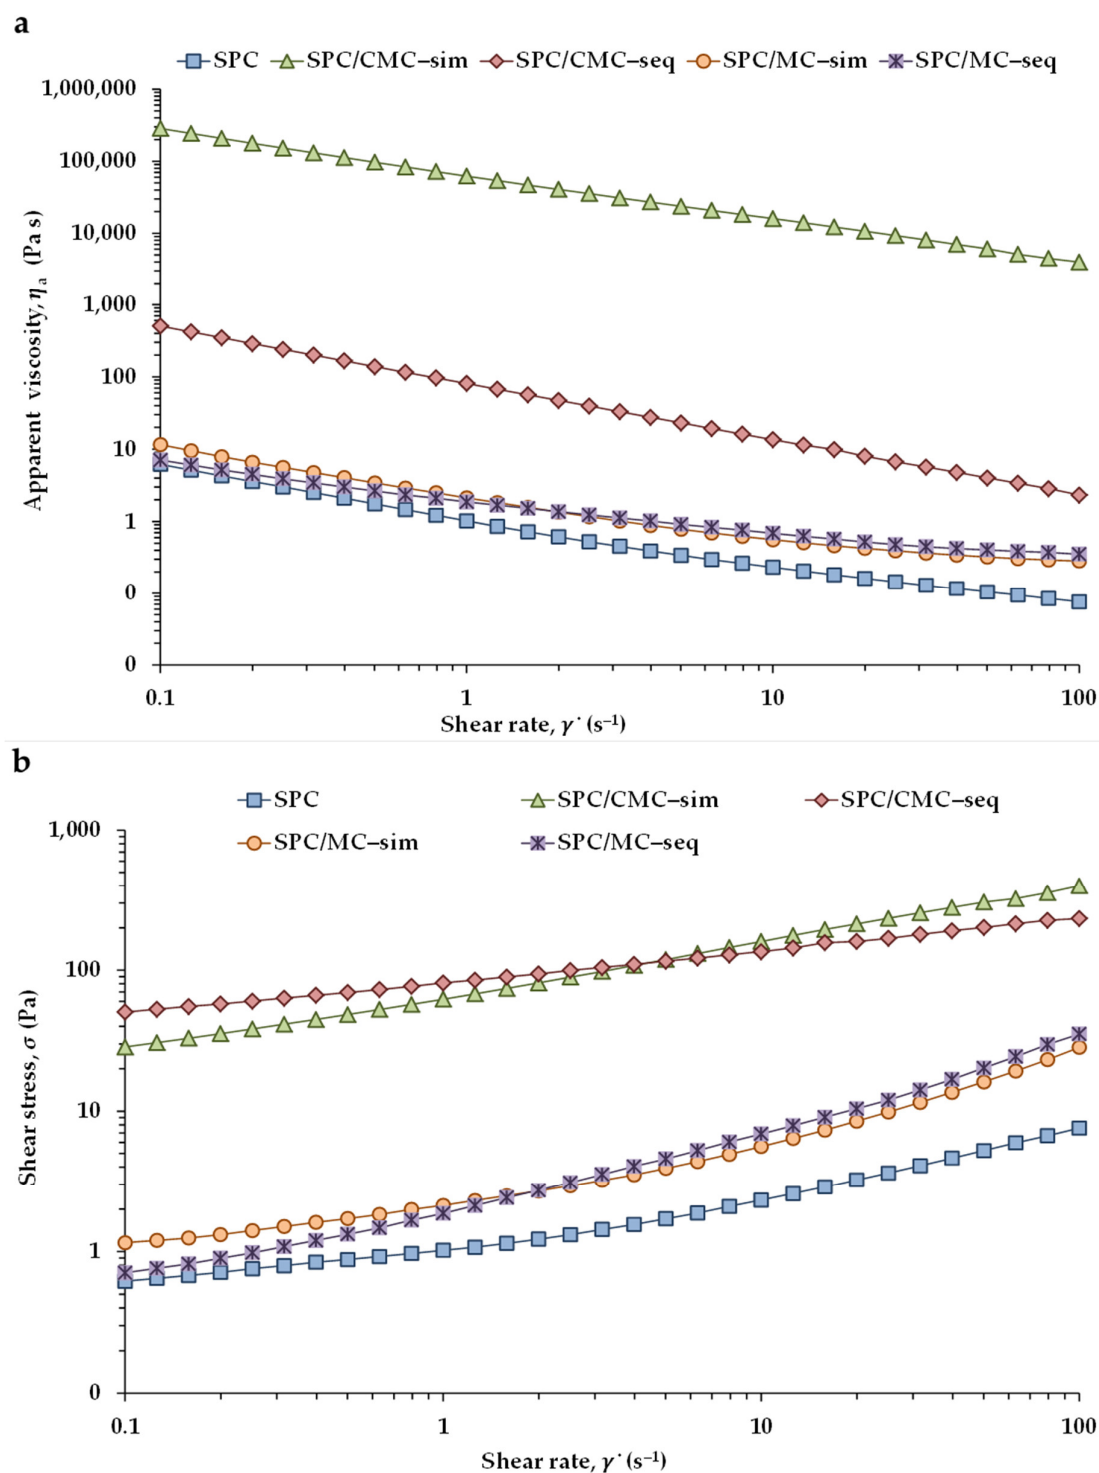

**Figure S2.** Apparent viscosity ( $\eta_a$ ) as a function of the time derived from three step shear rate tests for the emulsions at 37 °C.

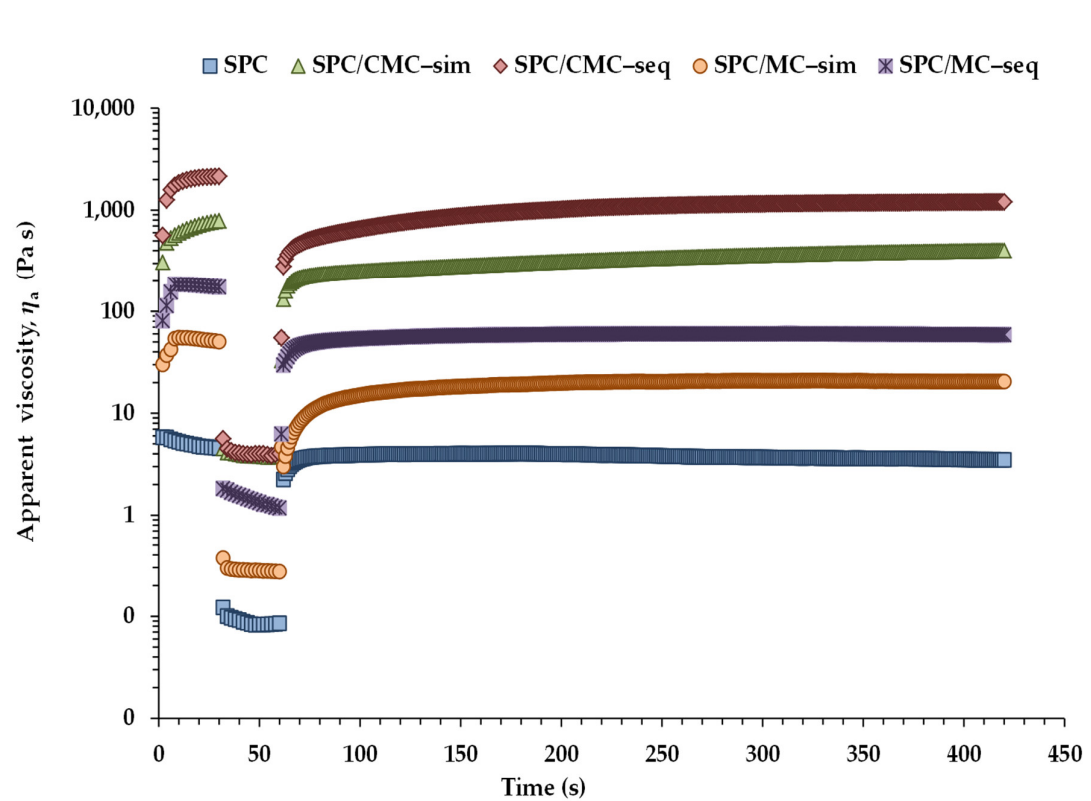

**Figure S3.** Apparent viscosity ( $\eta_a$ ) as a function of the time derived from three step shear rate tests for the emulsions at 37 °C.
